# Supplementary material for: Knocking Out the Transcription Factor OsNAC092 Promoted Rice Drought Tolerance
Source: MDPI journal article supplement (doi:10.3390/biology11121830), 2022-12-15
Supplement: s1 [file s1]

Supplemental table S1 Promoter sequence analysis

| Factor or Site Name | Signal Sequence | Reference                                                                                 | Number of binding sites |
|---------------------|-----------------|-------------------------------------------------------------------------------------------|-------------------------|
| WRKY71              | TGAC            | Involved in gibberellin signaling pathway in rice, affecting abscission                   | 12                      |
| MYBCORE             | CNGTTR          | Involved in dehydration in Arabidopsis                                                    | 8                       |
| MYB2consensus       | YAACKG          | Direct regulation of RD22 dehydration-responsive genes in Arabidopsis                     | 3                       |
| MYB2                | TAACTG          | Involved in dehydration signaling pathway in Arabidopsis                                  | 1                       |
| ERD1                | ACGT            | ACGT sequence induces erd1 gene expression in Arabidopsis                                 | 8                       |
| DOF                 | AAAG            | Dof protein in maize affects growth and development                                       | 26                      |
| GAPB                | ACTTTG          | GAPB encodes the chloroplast glyceraldehyde-3-phosphate dehydrogenation (GADPH) B subunit | 4                       |
| MYCCONSENSUSAT      | CANNTG          | MYC can interact with <i>rd22</i> , <i>CBF3</i> and <i>ICE1</i>                           | 18                      |

Supplemental table S2 off-target analysis of *OsNAC092*-sgRNA01

| Target                       | Chromosome | Position | Direction | Mismatches | Examined lines number | Off-targets number |
|------------------------------|------------|----------|-----------|------------|-----------------------|--------------------|
| GATCGgCCgAaAcGCC<br>GGAACGG  | chr3       | 3788628  | -         | 4          | 8                     | 0                  |
| GATCGCCCAtgAgGCC<br>GcAACGG  | chr3       | 33750481 | +         | 4          | 8                     | 0                  |
| cATCGCgCAATAAcaC<br>GGAATGG  | chr4       | 14331158 | +         | 4          | 8                     | 0                  |
| cATCGCgCAATAAcaC<br>GGAATGG  | chr4       | 14892707 | -         | 4          | 8                     | 0                  |
| cATgGCgCAATAAGCC<br>GGcAGGG  | chr4       | 22882929 | -         | 4          | 8                     | 0                  |
| GATCGaCCAATAAGgC<br>GatATGG  | chr2       | 7684332  | -         | 4          | 8                     | 0                  |
| GActGCCCgAgAAGCC<br>GGAAAGG  | chr10      | 18972232 | -         | 4          | 8                     | 0                  |
| GATtCCaAATgAGCC<br>GaAATGG   | chr9       | 17543867 | +         | 4          | 8                     | 0                  |
| GtTgGCCCCAgcAAGCC<br>GGcATGG | chr8       | 5438116  | -         | 4          | 8                     | 0                  |
| GATttCCCAATAAGgaG<br>tAATGG  | chr8       | 12977895 | +         | 4          | 8                     | 0                  |



Supplemental table S3    Gene description of response to oxidative response

| Gene Symbol  | Gene description                                        |
|--------------|---------------------------------------------------------|
| LOC4324556   | cationic peroxidase SPC4                                |
| LOC4325129   | peroxidase 72                                           |
| LOC4347963   | peroxidase N                                            |
| LOC4344393   | peroxidase 21                                           |
| LOC4337732   | peroxidase 5                                            |
| LOC4352160   | alpha-dioxygenase 1                                     |
| LOC4347962   | peroxidase A2                                           |
| LOC4337486   | cationic peroxidase SPC4                                |
| LOC4342185   | peroxidase 1-like                                       |
| LOC4337731   | peroxidase 5                                            |
| LOC4337483   | cationic peroxidase SPC4                                |
| LOC4327002   | peroxidase 1                                            |
| LOC4333554   | ornithine aminotransferase, mitochondrial-like          |
| LOC4328832   | peroxidase P7                                           |
| LOC4344279   | Peroxidase 2                                            |
| LOC4326874   | peroxidase 72                                           |
| LOC4332925   | peroxidase 2                                            |
| LOC4351300   | peroxidase 4                                            |
| LOC4344496   | peroxidase 47                                           |
| LOC4327377   | zinc finger protein ZAT12                               |
| LOC4326273   | peroxidase 24                                           |
| LOC4341249   | peroxidase P7                                           |
| LOC107280449 | peroxidase 5-like                                       |
| LOC4339223   | peroxidase 1-like                                       |
| LOC4342106   | thiosulfate sulfurtransferase 16, chloroplastic         |
| LOC4335739   | uncharacterized protein At1g32220,<br>chloroplastic     |
| LOC4337232   | peroxidase 4                                            |
| LOC4328841   | peroxidase 70                                           |
| LOC4328833   | peroxidase P7                                           |
| LOC4329907   | serine/threonine-protein kinase OXI1                    |
| LOC9271916   | probable galactinol--sucrose<br>galactosyltransferase 2 |
| LOC107275849 | cationic peroxidase 1                                   |
| LOC4335202   | probable L-ascorbate peroxidase 3, peroxisomal          |
| LOC4332175   | peroxidase A2                                           |
| LOC4331437   | peroxidase 5                                            |
| LOC4331114   | transcriptional corepressor<br>LEUNIG_HOMOLOG           |
| LOC4337482   | cationic peroxidase SPC4                                |
| LOC4342703   | probable galactinol--sucrose<br>galactosyltransferase 2 |
| LOC4349587   | peroxidase 4                                            |
| LOC4326716   | peroxidase 2                                            |



Supplemental table S4 Oligonucleotides used in this study

| primer name     | forward primer (5'→3')    | reverse primer (5'→3')    |
|-----------------|---------------------------|---------------------------|
| OsActin         | AGCTGCGGGTATCCATGAGA      | GCAATGCCAGGGAACATAGTG     |
| DCAS9           | TCTTCTCACCAGGGAGCTGAGCA   | CATATGCAGCAGCTATATGTGGA   |
| pZHY988         | GGGCTGATCCTAAGAAGAAGAGGAA | TTCTAATAAACGCTCTTTTCTCT   |
| <i>OsNAC050</i> | GTCGCAGTCGCACTCGCACACCCAC | CCAGCTCCGGGAAGGGGTCGTTGTC |
| 4325129         | CCTCTTCCCGCTAGACTTT       | CTTGCCAGACAGGATGTTC       |
| 4332851         | TGTTGATGATGGCGAGAA        | ATCAGCCACATTGGAAGG        |
| 4340349         | TTGCCTGGCTATGATACTCT      | TGTGCTTAGTGCCTTCCTC       |
| 4325401         | ACACCGACATGGAGGTTGA       | AGAGGCGAAGAGGAAGCA        |
| 4343814         | CGGCAGGGTCAAGAGTTCG       | CGTCTCGCTGGAGGAGTTCG      |
| 4346335         | GCTACCTCTTCACTCGCTCACA    | CGCCATTGTCGTCGTCGTT       |
| 4347135         | CGCATCTCGGGGCTCATC        | GCGTGCTCGGTGTAGGTGAC      |
| 4340632         | TGACAAGGCTGTGAGACA        | ATCGGAGACGAAGAGGAG        |
| 4325129         | CCTCTTCCCGCTAGACTTT       | CTTGCCAGACAGGATGTTC       |
| 4332851         | TGTTGATGATGGCGAGAA        | ATCAGCCACATTGGAAGG        |
